# Supplementary material
Source: PubMed Central journal article supplement (PMC8649023)
Supplement: ONCO-26-1026-s001.pdf [file ONCO-26-1026-s001.pdf]

Supplemental Table for:  
Efficacy of Platinum Rechallenge in Metastatic Urothelial Carcinoma after Previous Platinum-Based Chemotherapy for Metastatic Disease  
Risa Liang Wong et al.

**Supplemental Table 1. List of contributing institutions in the RISC database**

| <b>Name of Institution</b>                                 | <b>Location</b>                    |
|------------------------------------------------------------|------------------------------------|
| Heinrich Heine University Düsseldorf                       | Germany (Düsseldorf)               |
| University of Athens                                       | Greece (Athens)                    |
| Medical University of South Carolina                       | United States (Charleston, SC)     |
| University of Utah                                         | United States (Salt Lake City, UT) |
| San-Camillo Forlanini Hospital                             | Italy (Rome)                       |
| Karmanos Cancer Institute                                  | United States (Detroit, MI)        |
| Icahn School of Medicine at Mount Sinai                    | United States (New York, NY)       |
| Fox Chase Cancer Center                                    | United States (Philadelphia, PA)   |
| Fondazione IRCCS Istituto Nazionale dei Tumori             | Italy (Milan)                      |
| Dana Farber Cancer Institute                               | United States (Boston, MA)         |
| City of Hope Comprehensive Cancer Center                   | United States (Duarte, CA)         |
| Georges-François Leclerc Center for Cancer                 | France (Dijon)                     |
| Hospital Del Mar                                           | Spain (Barcelona)                  |
| Rabin Medical Center                                       | Israel (Petah Tivka)               |
| St. Bartholomew's Hospital                                 | United Kingdom (London)            |
| Hospital Quirón Barcelona                                  | Spain (Barcelona)                  |
| Istituto Romagnolo per lo Studio dei Tumori "Dino Amadori" | Italy (Meldola)                    |
| Denver VA Clinic                                           | United States (Denver, CO)         |
| Southampton General Hospital                               | United Kingdom (Southampton)       |
| University of Washington                                   | United States (Seattle, WA)        |
| Foch Hospital                                              | France (Suresnes)                  |
| Stanford University                                        | United States (Palo Alto, CA)      |
| Lausanne University Hospital                               | Switzerland (Lausanne)             |
| Memorial Sloan Kettering Cancer Center                     | United States (New York, NY)       |
| Princess Margaret Cancer Centre                            | Canada (Toronto)                   |
| University of North Carolina                               | United States (Chapel Hill, NC)    |
| University of Michigan                                     | United States (Ann Arbor, MI)      |
